# Supplementary material
Source: Research Square preprint supplement (doi:10.21203/rs.3.rs-9654864/v1)
Supplement: Supplementary file 1 [file f93004a77db7bc1299ddbe08.xlsx]

## Sheet: Table 1
Supplementary Table 1. Codon sequences of OP and NC variants for 5 heterologous proteins (DHOase, SMURF1, Luciferase)
Protein ID	Codon Sequence
DHOase-OP	ATGACCAGCCAGAAACTGGTTCGTCTGCCTGGTCTGATTGATGTTCATGTTCATCTGCGTGAACCTGGTGGCACCCATAAAGAAGATTTTGCAAGCGGCACCGCAGCAGCACTGGCAGGCGGTATTACCATGGTTTGTGCAATGCCGAATACACGTCCGCCTATTATTGATGGTCCGGCACTGGCACTGGCCCAAAAACTGGCCGAAGCCGGTGCACGTTGTGATTTTGCACTGTTTCTGGGTGCAAGCAGCGAAAATGCAGGCACCCTGGGCACCGTTGCAGGTAGCGCAGCAGGTCTGAAACTGTATCTGAATGAAACCTTTAGCGAACTGCGTCTGGATAGCGTTGTTCAGTGGATGGAACATTTTGAAACCTGGCCGAGCCATCTGCCGATTGTT…
DHOase-NC1	ATGACTTCCCAAAAATTGGTTCGTCTTCCCGGTTTAATTGACGTTCACGTACACCTTCGCGAACCTGGTGGTACCCACAAGGAAGACTTTGCAAGCGGGACCGCGGCGGCACTGGCGGGGGGGATCACGATGGTGTGTGCAATGCCGAACACCCGCCCGCCGATCATCGATGGCCCAGCCCTGGCCCTCGCGCAGAAACTGGCGGAAGCCGGCGCGCGGTGTGACTTCGCCCTGTTCCTGGGGGCCAGCAGCGAGAACGCCGGCACGCTGGGGACCGTGGCCGGAAGCGCCGCCGGACTGAAGTTGTACCTGAACGAGACCTTCTCCGAGTTGCGCCTGGACTCCGTTGTGCAGTGGATGGAGCACTTCGAAACCTGGCCGAGCCACCTGCCCATCGTC…
SMURF1-HECT-OP	CAGCGCTATGAACGCGACCTAGTTCAGAAGTTGAAGGTACTGCGTCATGAACTTTCTTTGCAACAGCCCCAAGCCGGTCATTGCCGCATTGAAGTGAGCCGCGAAGAAATTTTTGAAGAAAGCTATCGCCAAATTATGAAAATGCGCCCGAAAGATCTGAAAAAACGATTAATGGTGAAATTTCGTGGCGAGGAGGGCTTAGACTATGGTGGTGTGGCGCGGGAATGGTTATATCTACTATGTCACGAAATGCTGAATCCGTATTATGGTCTGTTTCAATATTCCACGGATAACATTTATATGTTACAGATTAATCCTGATTCATCAATCAACCCTGATCATCTCTCTTATTTTCATTTTGTAGGCCGTATTATGGGCTTGGCGGTATTTCATGGTCAT…
SMURF1-HECT-NC1	CAGCGCTATGAACGCGACCTAGTTCAGAAGTTGAAGGTACTGCGTCATGAACTTTCTTTGCAACAGCCCCAAGCCGGTCATTGCCGCATTGAAGTGAGCCGCGAAGAAATTTTTGAAGAAAGCTATCGCCAAATTATGAAAATGCGCCCGAAAGATCTGAAAAAACGATTAATGGTGAAATTTCGTGGCGAGGAGGGCTTAGACTATGGTGGTGTGGCGCGGGAATGGTTATATCTACTATGTCACGAAATGCTGAATCCGTATTATGGTCTGTTTCAATATTCCACGGATAACATTTATATGTTACAGATTAATCCTGATTCATCAATCAACCCTGATCATCTCTCTTATTTTCATTTTGTAGGCCGTATTATGGGCTTGGCGGTATTTCATGGTCAT…
Luciferase-OP	ATGGAAGATGCTAAAAACATCAAGAAAGGTCCGGCTCCATTCTATCCACTGGAGGACGGTACTGCTGGTGAACAGCTGCATAAAGCGATGAAACGTTACGCGCTGGTGCCGGGCACCATCGCGTTCACTGACGCACACATCGAAGTTAACATCACCTACGCTGAATACTTCGAAATGTCTGTTCGTCTGGCTGAAGCGATGAAGCGTTACGGCCTGAACACCAACCACCGTATCGTTGTGTGCTCTGAGAACAGCCTTCAGTTCTTCATGCCAGTTCTGGGCGCACTGTTCATCGGTGTTGCTGTTGCACCGGCAAACGACATCTACAACGAACGTGAACTGCTGAACTCCATGAACATCTCTCAGCCGACCGTTGTGTTCGTTTCCAAGAAGGGCCTC…
Luciferase-NC1	ATGGAAGATGCGAAAAATATCAAAAAAGGACCTGCACCTTTTTACCCCTTGGAAGATGGAACTGCGGGAGAACAACTACATAAGGCTATGAAAAGGTATGCCCTTGTTCCTGGGACTATCGCCTTCACCGATGCCCACATCGAAGTTAACATCACCTACGCTGAATATTTTGAAATGAGTGTGAGGTTGGCTGAAGCCATGAAAAGGTATGGACTGAATACAAACCACAGGATCGTCGTATGCAGCGAGAACAGCCTTCAATTTTTCATGCCTGTTTTGGGAGCGCTTTTTATTGGTGTAGCGGTAGCCCCTGCTAACGATATCTACAATGAAAGGGAATTGCTGAACAGTATGAACATCTCTCAACCTACCGTAGTGTTTGTCTCAAAAAAAGGCTTA…
GFP-OP	ATGAGCAAAGGCGAAGAACTGTTCACCGGTGTAGTACCGATCTTGGTTGAACTGGACGGTGACGTTAACGGCCACAAATTCTCCGTATCCGGCGAAGGCGAAGGTGACGCTACCTACGGTAAACTGACTCTGAAATTCATCTGTACCACCGGCAAACTGCCGGTTCCGTGGCCGACCTTGGTGACCACCTTCAGCTACGGTGTTCAGTGCTTCAGCCGTTATCCGGACCACATGAAACGTCACGATTTCTTCAAATCCGCTATGCCGGAAGGCTACGTTCAAGAACGTACCATCTTCTTCAAAGACGATGGCAACTACAAGACTCGTGCAGAAGTTAAATTCGAAGGTGATACTCTGGTTAACCGTATCGAACTGAAAGGTATCGACTTCAAAGAAGAT…
GFP-NC1	ATGAGCAAGGGGGAAGAACTTTTCACAGGCGTAGTACCTATCCTGGTAGAGCTGGATGGCGATGTTAATGGTCATAAGTTTTCTGTCAGCGGAGAGGGCGAGGGTGACGCAACTTATGGCAAACTGACCCTCAAATTCATTTGCACCACCGGGAAGTTACCTGTGCCTTGGCCTACTCTGGTGACCACCTTTTCCTACGGAGTCCAGTGTTTTTCAAGATACCCTGATCACATGAAGAGACACGACTTTTTTAAGTCAGCTATGCCGGAAGGTTATGTACAAGAAAGAACCATCTTTTTTAAGGACGATGGTAATTATAAGACACGTGCTGAGGTCAAATTCGAAGGCGACACCCTGGTTAATCGCATTGAGTTAAAAGGCATTGATTTTAAGGAAGAT…
HPPD-OP	GCCTCTGCAGCTGAGCAGGCCGCATTCCGTTTAGTGGGGCACCGCAACTTCGTTCGTTTCAATCCACGTAGCGACCGGTTCCACACCTTAGCGTTCCACCATGTCGAGTTGTGGTGTGCTGACGCGGCAAGCGCAGCTGGTCGCTTCTCCTTTGGTCTCGGAGCACCGCTCGCCGCACGTAGTGACTTATCTACCGGCAACTCCGCGCACGCAAGCCTTCTGCTGCGTTCCGGGTCACTGTCTTTTCTCTTCACTGCACCATACGCTCACGGTGCCGATGCCGCTACAGCAGCACTGCCATCATTCTCCGCAGCTGCCGCTCGTCGCTTTGCGGCTGATCATGGTCTTGCAGTGCGGGCCGTAGCACTTCGTGTTGCGGATGCGGAAGACGCATTCCGT…
HPPD-NC1	GCGTCCGCAGCCGAGCAAGCCGCATTTCGACTCGTTGGTCACCGCAATTTCGTCCGATTCAACCCGCGCTCGGACCGCTTTCACACCCTGGCGTTCCACCATGTTGAACTATGGTGCGCAGACGCGGCCAGCGCCGCCGGCCGATTCTCTTTTGGCCTGGGCGCCCCCCTGGCGGCGAGGTCCGACCTGAGCACCGGCAACTCGGCGCACGCGTCGCTACTGCTGCGCTCGGGCAGCCTGTCGTTCCTGTTTACCGCCCCGTATGCGCACGGCGCCGACGCGGCCACCGCCGCACTCCCCTCGTTCTCCGCTGCTGCGGCGCGACGCTTTGCCGCCGATCACGGCCTGGCCGTGCGCGCGGTTGCACTCAGGGTGGCGGACGCAGAAGACGCGTTCCGA…

## Sheet: Table 2
Supplementary Table 2. Codon sequences of 4 proteins expressed via NatCodon model (NC) vs. structure-lacking variant (NC-NS)
Method	Codon Sequence
DHOase-NC-NS	ATGACTAGCCAGAAGCTGGTTCGACTGCCCGGCCTCATCGATGTGCACGTGCACCTGCGCGAACCCGGCGGTACGCATAAAGAGGATTTTGCCAGCGGCACCGCCGCCGCCCTGGCCGGCGGGATCACGATGGTGTGCGCCATGCCGAACACGCGCCCGCCGATCATCGATGGCCCGGCACTGGCCCTGGCACAAAAACTGGCCGAGGCCGGCGCCCGGTGCGACTTCGCGCTGTTCCTGGGCGCCTCGAGCGAGAACGCGGGGACCCTCGGCACGGTCGCCGGTTCGGCCGCCGGGCTGAAACTGTATCTCAACGAGACGTTCAGCGAGCTCCGCCTGGATAGCGTCGTCCAATGGATGGAACATTTCGAAACCTGGCCCTCGCACCTGCCGATTGTC…
SMURF1-HECT-NC-NS	CAACGTTATGAAAGAGATTTAGTACAGAAATTGAAAGTACTGCGCCACGAGCTGTCCCTGCAGCAACCTCAGGCAGGTCATTGTAGAATTGAAGTATCACGTGAAGAAATTTTTGAAGAATCCTATCGACAGATCATGAAAATGCGCCCTAAAGATCTGAAAAAAAGACTGATGGTAAAATTCCGTGGTGAAGAAGGCCTGGACTATGGCGGAGTTGCACGCGAATGGTTGTATCTGTTATGTCATGAAATGTTAAACCCTTACTACGGTCTGTTTCAATACTCTACTGATAACATCTATATGCTGCAAATCAACCCGGATTCATCGATTAATCCAGATCATCTGTCCTATTTTCATTTTGTCGGGCGCATCATGGGCCTGGCTGTTTTTCACGGCCAT…
Luciferase-NC-NS	CATATGGAAGATGCAAAAAACATCAAAAAGGGCCCGGCACCTTTTTACCCATTGGAAGACGGCACAGCAGGCGAACAGTTACACAAGGCAATGAAACGATATGCGTTAGTTCCAGGCACCATCGCCTTCACTGATGCACACATCGAAGTAAATATCACCTACGCTGAATATTTTGAAATGTCGGTCCGCTTAGCGGAAGCCATGAAACGGTATGGTCTTAATACAAACCATCGTATTGTGGTGTGCTCTGAAAACAGCCTGCAGTTTTTTATGCCGGTGTTGGGCGCACTTTTCATTGGTGTGGCAGTGGCGCCTGCAAATGACATTTATAACGAACGCGAACTGTTAAACTCCATGAATATTTCACAGCCTACGGTCGTCTTCGTTTCCAAAAAGGGC…
Cry1Ab-NC	ATGGACAACAATCCGAACATTAACGAGTGCATCCCGTACAATTGTTTAAGTAACCCCGAAGTGGAAGTGCTGGGGGGCGAACGCATCGAGACGGGGTATACCCCCATTGACATCTCGCTGTCCCTCACCCAGTTCCTCCTGAGCGAATTTGTACCTGGCGCAGGTTTTGTTCTGGGCTTAGTGGATATCATTTGGGGCATTTTCGGTCCCTCACAGTGGGACGCGTTTCTGGTACAGATCGAACAGCTGATCAACCAACGCATTGAAGAATTCGCCCGGAATCAAGCGATTAGTCGGCTAGAAGGACTCTCGAACCTGTATCAGATCTACGCTGAAAGCTTTCGGGAATGGGAAGCTGATCCGACTAACCCGGCGCTCCGGGAGGAAATGCGCATCCAA…
Cry1Ab-NC-NS	ATGGACAATAACCCTAACATAAACGAATGCATACCTTATAATTGCCTCAGTAATCCAGAAGTGGAAGTGCTCGGCGGCGAAAGAATCGAAACTGGCTATACTCCTATAGACATAAGTCTGAGTTTAACTCAGTTTCTCTTAAGCGAATTTGTGCCAGGCGCTGGCTTTGTGCTGGGCCTCGTAGACATAATCTGGGGCATCTTTGGCCCTAGCCAGTGGGACGCTTTTCTGGTGCAGATCGAACAGCTGATCAATCAGAGAATCGAGGAATTTGCTAGAAATCAGGCTATATCGAGACTGGAAGGCTTAAGTAACCTGTATCAGATATATGCTGAATCGTTTAGGGAATGGGAAGCTGACCCTACCAATCCAGCTCTCAGAGAAGAAATGCGTATCCAG…

## Sheet: Table 3
Supplementary Table 3. Codon Sequences of Proteins Used for Correlation Analysis Between NCI/CAI and Protein Expression Levels.To fully verify the reliability of NCI, we incorporates all sequences generated during the model iteration process, leading to the distinct number of iterative sequences corresponding to each target protein.
Protein Name	Codon Sequence
DHOase-NC1	ATGACTTCCCAAAAATTGGTTCGTCTTCCCGGTTTAATTGACGTTCACGTACACCTTCGCGAACCTGGTGGTACCCACAAGGAAGACTTTGCAAGCGGGACCGCGGCGGCACTGGCGGGGGGGATCACGATGGTGTGTGCAATGCCGAACACCCGCCCGCCGATCATCGATGGCCCAGCCCTGGCCCTCGCGCAGAAACTGGCGGAAGCCGGCGCGCGGTGTGACTTCGCCCTGTTCCTGGGGGCCAGCAGCGAGAACGCCGGCACGCTGGGGACCGTGGCCGGAAGCGCCGCCGGACTGAAGTTGTACCTGAACGAGACCTTCTCCGAGTTGCGCCTGGACTCCGTTGTGCAGTGGATGGAGCACTTCGAAACCTGGCCGAGCCACCTGCCCATCGTC…
DHOase-NC2	ATGACATCCCAGAAATTGGTTAGATTACCTGGCCTCATTGACGTGCATGTTCACCTCCGCGAGCCGGGCGGAACCCACAAGGAGGATTTCGCCAGCGGCACTGCGGCGGCGCTGGCGGGCGGAATCACCATGGTCTGTGCCATGCCAAATACCCGCCCCCCGATCATCGATGGCCCGGCGCTGGCGCTGGCGCAGAAGCTGGCGGAGGCGGGCGCCCGCTGCGACTTCGCGCTGTTTCTGGGCGCCAGCTCGGAAAACGCCGGCACCCTGGGCACCGTTGCCGGTTCCGCGGCGGGCTTGAAGTTGTACCTCAACGAGACCTTCTCCGAGCTCCGCCTGGACAGCGTCGTTCAGTGGATGGAGCACTTTGAAACCTGGCCGAGTCATCTGCCGATCGTG…
DHOase-NC3	ATGACAAGCCAGAAGTTGGTCCGTCTGCCGGGCCTGATTGACGTCCATGTCCATCTCCGCGAACCGGGTGGCACCCACAAAGAAGACTTCGCCAGCGGCACCGCCGCCGCCCTCGCCGGGGGTATCACCATGGTGTGCGCCATGCCGAACACCCGCCCGCCGATCATCGATGGGCCCGCCCTGGCGCTGGCACAGAAACTGGCCGAGGCCGGCGCGCGCTGCGACTTCGCCCTCTTCCTGGGCGCCTCCTCGGAGAACGCAGGCACGTTGGGTACCGTCGCGGGCAGCGCCGCCGGCCTGAAGCTGTACCTCAACGAGACCTTCAGCGAACTGCGTCTGGACTCCGTGGTCCAGTGGATGGAACACTTCGAAACCTGGCCGTCCCACCTGCCGATCGTG…
DHOase-NC4	ATGACTTCACAAAAATTGGTGCGGCTGCCTGGCTTGATCGACGTTCACGTCCACCTGCGGGAGCCGGGTGGTACCCACAAGGAGGACTTTGCGTCAGGGACCGCCGCCGCTCTGGCCGGCGGCATCACCATGGTGTGCGCGATGCCGAACACACGTCCGCCGATCATTGACGGCCCTGCGCTGGCGCTCGCTCAGAAGCTGGCCGAAGCCGGAGCGCGATGCGATTTCGCGCTCTTCTTAGGCGCCTCCTCTGAGAACGCGGGGACCCTGGGCACCGTCGCGGGCAGTGCCGCCGGCCTCAAATTGTACCTGAACGAAACCTTCAGCGAGCTGCGCCTGGATTCGGTCGTGCAGTGGATGGAACACTTCGAGACCTGGCCTTCCCACCTGCCGATTGTG…
SMURF1-HECT-NC1	CAGCGCTATGAACGCGACCTAGTTCAGAAGTTGAAGGTACTGCGTCATGAACTTTCTTTGCAACAGCCCCAAGCCGGTCATTGCCGCATTGAAGTGAGCCGCGAAGAAATTTTTGAAGAAAGCTATCGCCAAATTATGAAAATGCGCCCGAAAGATCTGAAAAAACGATTAATGGTGAAATTTCGTGGCGAGGAGGGCTTAGACTATGGTGGTGTGGCGCGGGAATGGTTATATCTACTATGTCACGAAATGCTGAATCCGTATTATGGTCTGTTTCAATATTCCACGGATAACATTTATATGTTACAGATTAATCCTGATTCATCAATCAACCCTGATCATCTCTCTTATTTTCATTTTGTAGGCCGTATTATGGGCTTGGCGGTATTTCATGGTCAT…
SMURF1-HECT-NC2	CAACGCTATGAACGAGATTTGGTACAGAAACTGAAAGTCTTGCGGCATGAATTGAGCTTGCAGCAGCCGCAAGCTGGTCATTGTCGCATTGAGGTCAGCCGTGAGGAGATTTTCGAAGAGTCGTACCGACAGATCATGAAGATGCGGCCGAAAGATCTCAAGAAGCGCTTAATGGTGAAATTTCGCGGCGAAGAGGGGTTGGATTATGGCGGCGTGGCGCGCGAGTGGTTGTACTTGTTGTGTCACGAAATGTTGAATCCGTATTACGGTTTGTTTCAGTACTCAACTGATAATATCTACATGCTGCAAATCAATCCGGATAGCAGCATAAACCCGGATCATTTGTCTTATTTCCATTTTGTAGGGCGTATCATGGGTCTAGCGGTGTTCCACGGTCAC…
SMURF1-HECT-NC3	CAACGTTACGAACGTGATTTAGTACAAAAATTGAAAGTGCTTCGCCACGAACTTTCTTTGCAGCAGCCGCAGGCTGGACATTGTCGTATCGAAGTGAGCCGCGAGGAGATTTTTGAAGAAAGCTACCGCCAGATTATGAAAATGCGTCCAAAAGACTTGAAGAAACGTTTGATGGTTAAATTTCGTGGTGAGGAGGGCTTGGATTACGGGGGCGTGGCCCGCGAGTGGTTATACCTGCTTTGCCACGAAATGCTGAACCCGTATTATGGTCTGTTTCAGTATAGTACCGATAATATTTACATGTTACAGATTAACCCTGACTCTTCTATTAATCCAGATCACTTGTCCTACTTTCATTTCGTTGGCCGCATTATGGGGTTGGCTGTATTTCATGGCCAC…
SMURF1-HECT-NC4	CAAAGATATGAAAGGGATCTAGTACAAAAACTCAAAGTTTTGAGACATGAACTAAGTCTCCAACAGCCTCAAGCCGGACATTGCAGGATAGAGGTTAGCAGGGAAGAAATTTTTGAAGAAAGCTACCGACAGATTATGAAAATGAGGCCTAAAGATTTGAAAAAACGTTTAATGGTGAAGTTTAGAGGCGAAGAAGGTTTGGATTACGGTGGCGTTGCTAGAGAATGGCTATACTTGTTATGTCATGAGATGCTCAATCCGTATTATGGTTTATTTCAATATAGTACCGACAATATTTATATGTTGCAAATTAACCCTGATTCAAGCATTAATCCAGACCATCTATCATATTTTCATTTCGTCGGCCGTATTATGGGCTTGGCAGTTTTTCATGGTCAT…
ULP1-NC1	TTGGTGCCCGAACTCAATGAAAAAGATGACGACCAGGTCCAAAAAGCCTTGGCCTCACGCGAAACCCAGCTCATGAATCGCAACATCGAAATCACGGTCCGTGATTTCAAGACCCTTGCGCCGCGTCGCTGGCTGAACGACACAATCATCGAGTTCTTTATGAAATATATTGAAAAAAGTACGCCTAACACCGTTGCGTTCAACAGCTTTTTTTACACTAATCTTTCAGAGAGAGGCTATCAAGGCGTCCGTCGTTGGATGAAAAGAAAAAAAACACAAATCGACAAACTGGATAAAATCTTTACCCCGATTAACCTTAACCAGTCTCATTGGGCGCTGGGTATCATTGACTTGAAAAAAAAAACCATCGGCTACGTTGATAGCCTGTCGAATGGTCCT…
ULP1-NC2	TTGGTGCCCGAGTTAAATGAAAAAGATGATGATCAGGTACAGAAAGCTCTTGCTTCCAGGGAAACCCAGCTTATGAATCGAAACATTGAAATTACCGTTCGAGATTTTAAAACCCTGGCTCCGCGCCGCTGGCTGAACGATACCATTATTGAATTTTTTATGAAATATATCGAAAAAAGTACTCCGAATACTGTCGCCTTTAACTCTTTTTTTTATACAAATCTTTCGGAGAGAGGGTATCAGGGTGTTAGAAGATGGATGAAAAGGAAAAAAACTCAAATTGACAAATTAGATAAAATTTTTACACCGATTAATTTGAATCAATCTCATTGGGCACTTGGCATTATTGACTTAAAAAAGAAGACCATTGGGTATGTTGATAGTCTCTCGAATGGACCG…
ULP1-NC3	TTGGTTCCAGAACTGAACGAAAAAGATGATGATCAAGTCCAAAAAGCATTGGCGTCTCGTGAAACTCAATTAATGAATAGAAATATCGAGATTACAGTTCGCGATTTTAAGACCTTAGCTCCTCGCAGATGGTTAAATGATACTATTATTGAATTTTTCATGAAGTATATTGAAAAAAGTACACCCAACACAGTAGCATTTAATAGTTTTTTTTACACAAATCTTTCAGAACGCGGTTATCAGGGCGTTCGCCGCTGGATGAAACGTAAAAAAACACAAATTGACAAACTTGATAAAATATTCACTCCTATTAATTTGAATCAAAGCCACTGGGCATTGGGCATTATTGACTTAAAAAAAAAAACAATTGGTTATGTAGATTCCTTATCAAACGGTCCC…
Luciferase-NC1	ATGGAAGATGCGAAAAATATCAAAAAAGGACCTGCACCTTTTTACCCCTTGGAAGATGGAACTGCGGGAGAACAACTACATAAGGCTATGAAAAGGTATGCCCTTGTTCCTGGGACTATCGCCTTCACCGATGCCCACATCGAAGTTAACATCACCTACGCTGAATATTTTGAAATGAGTGTGAGGTTGGCTGAAGCCATGAAAAGGTATGGACTGAATACAAACCACAGGATCGTCGTATGCAGCGAGAACAGCCTTCAATTTTTCATGCCTGTTTTGGGAGCGCTTTTTATTGGTGTAGCGGTAGCCCCTGCTAACGATATCTACAATGAAAGGGAATTGCTGAACAGTATGAACATCTCTCAACCTACCGTAGTGTTTGTCTCAAAAAAAGGCTTA…
Luciferase-NC2	ATGGAAGATGCAAAAAATATTAAAAAAGGCCCAGCACCTTTTTATCCGCTAGAGGATGGGACAGCTGGAGAGCAACTGCACAAAGCAATGAAACGATATGCTCTGGTTCCTGGTACAATAGCCTTTACAGACGCCCACATCGAAGTCAATATTACCTACGCAGAGTATTTTGAAATGAGTGTTCGACTTGCTGAGGCTATGAAGCGATATGGGTTAAATACCAACCATCGAATTGTGGTTTGTTCAGAAAATAGTTTACAATTTTTTATGCCGGTCCTGGGGGCGCTATTTATCGGGGTAGCCGTAGCTCCGGCTAATGACATATATAATGAAAGGGAATTACTGAATTCAATGAATATTTCACAACCGACCGTGGTTTTTGTTTCAAAAAAAGGGCTA…
Luciferase-NC3	ATGGAAGATGCAAAAAACATCAAAAAGGGCCCGGCACCTTTTTACCCGCTGGAAGACGGCACAGCAGGCGAACAGCTGCACAAGGCAATGAAACGCTATGCGTTAGTTCCTGGTACCATCGCCTTCACTGATGCACACATCGAAGTTAATATCACCTACGCTGAATATTTTGAAATGTCGGTCCGCTTAGCGGAAGCCATGAAACGGTATGGTCTTAATACAAACCATCGTATTGTGGTGTGCTCTGAAAACAGCCTCCAGTTTTTTATGCCGGTGTTGGGCGCACTTTTCATTGGTGTGGCAGTGGCACCTGCAAATGACATCTATAACGAACGCGAACTGTTGAACTCCATGAATATTTCACAACCTACCGTCGTCTTCGTTTCGAAAAAGGGCTTG…
Luciferase-NC4	ATGGAAGATGCAAAAAACATCAAAAAGGGCCCGGCACCTTTCTACCCGTTGGAAGACGGTACAGCAGGCGAACAGCTTCACAAGGCCATGAAACGCTATGCGTTAGTTCCAGGCACCATCGCCTTCACTGATGCACACATCGAAGTAAATATTACCTACGCAGAATATTTTGAAATGTCGGTCCGCTTAGCGGAAGCCATGAAACGGTATGGTCTTAACACCAACCATCGTATTGTGGTGTGCTCTGAAAACAGCCTCCAGTTTTTTATGCCGGTGTTGGGCGCGCTTTTCATTGGTGTGGCAGTGGCACCTGCCAATGACATTTATAACGAACGTGAACTTCTGAACTCCATGAATATTTCACAGCCTACGGTCGTCTTCGTTTCCAAAAAGGGCTTG…
Luciferase-NC5	ATGGAAGATGCAAAAAACATCAAAAAGGGCCCGGCACCTTTCTACCCACTGGAAGACGGCACAGCAGGCGAACAGCTTCACAAGGCAATGAAACGCTATGCGTTAGTTCCAGGAACCATCGCCTTCACTGATGCACACATCGAAGTAAATATTACCTATGCAGAATATTTTGAAATGTCGGTCCGCTTAGCGGAAGCCATGAAACGGTATGGTCTTAACACAAACCATCGTATTGTGGTGTGCTCTGAAAACAGCCTGCAGTTTTTTATGCCGGTGTTGGGCGCGCTTTTCATTGGTGTGGCAGTGGCACCTGCCAATGACATCTATAACGAACGTGAACTGTTAAACTCCATGAATATTTCACAACCTACGGTCGTCTTCGTTTCGAAAAAGGGCTTG…
Luciferase-NC6	ATGGAAGATGCAAAAAACATCAAAAAGGGCCCGGCACCTTTTTACCCATTGGAAGACGGCACAGCAGGCGAACAGTTACACAAGGCAATGAAACGATATGCGTTAGTTCCAGGCACCATCGCCTTCACTGATGCACACATCGAAGTAAATATCACCTACGCTGAATATTTTGAAATGTCGGTCCGCTTAGCGGAAGCCATGAAACGGTATGGTCTTAATACAAACCATCGTATTGTGGTGTGCTCTGAAAACAGCCTGCAGTTTTTTATGCCGGTGTTGGGCGCACTTTTCATTGGTGTGGCAGTGGCGCCTGCAAATGACATTTATAACGAACGCGAACTGTTAAACTCCATGAATATTTCACAGCCTACGGTCGTCTTCGTTTCCAAAAAGGGCTTG…
Luciferase-NC7	ATGGAAGATGCAAAAAACATCAAAAAGGGCCCGGCACCTTTTTACCCGTTGGAAGACGGCACAGCAGGCGAACAGCTGCACAAGGCCATGAAAAGGTATGCGTTAGTTCCTGGTACCATCGCCTTCACTGATGCACACATCGAGGTTAATATCACCTACGCTGAATATTTTGAAATGTCGGTCAGATTAGCGGAAGCCATGAAACGGTATGGTCTTAACACAAACCATCGTATTGTGGTGTGCTCTGAAAACAGCCTCCAGTTTTTTATGCCGGTGTTGGGCGCACTTTTCATTGGTGTGGCAGTGGCACCTGCAAATGACATCTATAACGAACGCGAACTTTTGAACTCCATGAATATTTCACAACCTACTGTCGTCTTCGTTTCGAAAAAGGGCTTG…
GFP-NC1	ATGAGCAAGGGGGAAGAACTTTTCACAGGCGTAGTACCTATCCTGGTAGAGCTGGATGGCGATGTTAATGGTCATAAGTTTTCTGTCAGCGGAGAGGGCGAGGGTGACGCAACTTATGGCAAACTGACCCTCAAATTCATTTGCACCACCGGGAAGTTACCTGTGCCTTGGCCTACTCTGGTGACCACCTTTTCCTACGGAGTCCAGTGTTTTTCAAGATACCCTGATCACATGAAGAGACACGACTTTTTTAAGTCAGCTATGCCGGAAGGTTATGTACAAGAAAGAACCATCTTTTTTAAGGACGATGGTAATTATAAGACACGTGCTGAGGTCAAATTCGAAGGCGACACCCTGGTTAATCGCATTGAGTTAAAAGGCATTGATTTTAAGGAAGAT…
GFP-NC2	ATGAGCAAAGGAGAAGAATTGTTTACAGGAGTCGTCCCGATTTTAGTAGAGTTAGATGGTGATGTTAATGGCCACAAATTTAGCGTGTCAGGCGAAGGTGAAGGTGATGCGACCTATGGTAAGCTCACGTTAAAATTTATCTGCACAACAGGAAAATTGCCAGTTCCCTGGCCGACTTTAGTAACCACATTTTCTTATGGGGTTCAATGCTTTTCAAGATACCCCGATCATATGAAAAGACATGATTTTTTTAAAAGTGCTATGCCAGAAGGTTATGTACAAGAACGTACTATATTCTTTAAAGATGATGGTAATTATAAAACGCGTGCTGAAGTTAAATTTGAAGGCGATACGTTGGTTAATAGAATTGAATTAAAAGGTATCGATTTTAAGGAAGAT…
GFP-NC3	ATGTCTAAAGGAGAAGAACTTTTTACAGGTGTGGTTCCTATCTTGGTTGAATTAGATGGTGATGTCAATGGTCATAAATTTTCAGTTTCAGGCGAAGGCGAAGGAGATGCAACCTACGGAAAACTAACATTGAAATTTATTTGCACAACAGGAAAACTTCCAGTACCTTGGCCTACATTGGTAACAACGTTTAGTTATGGCGTTCAGTGTTTTAGTAGATATCCTGATCATATGAAAAGACATGATTTTTTTAAATCAGCAATGCCAGAAGGTTATGTACAGGAAAGGACAATTTTTTTCAAGGATGATGGCAATTATAAAACACGTGCAGAAGTCAAATTTGAAGGTGATACCTTGGTAAATAGAATCGAATTAAAAGGTATTGATTTTAAAGAAGAC…
HDDP-NC1	GCGTCCGCAGCCGAGCAAGCCGCATTTCGACTCGTTGGTCACCGCAATTTCGTCCGATTCAACCCGCGCTCGGACCGCTTTCACACCCTGGCGTTCCACCATGTTGAACTATGGTGCGCAGACGCGGCCAGCGCCGCCGGCCGATTCTCTTTTGGCCTGGGCGCCCCCCTGGCGGCGAGGTCCGACCTGAGCACCGGCAACTCGGCGCACGCGTCGCTACTGCTGCGCTCGGGCAGCCTGTCGTTCCTGTTTACCGCCCCGTATGCGCACGGCGCCGACGCGGCCACCGCCGCACTCCCCTCGTTCTCCGCTGCTGCGGCGCGACGCTTTGCCGCCGATCACGGCCTGGCCGTGCGCGCGGTTGCACTCAGGGTGGCGGACGCAGAAGACGCGTTCCGA…
HDDP-NC2	GCTAGCGCTGCTGAACAGGCTGCTTTTCGTTTAGTGGGCCACCGGAACTTTGTGAGATTTAACCCACGGTCGGACAGATTTCACACCCTCGCTTTTCACCACGTAGAACTCTGGTGCGCTGACGCTGCTTCGGCTGCTGGCCGTTTTAGCTTTGGCTTAGGCGCTCCCCTCGCTGCTCGCTCGGACCTCTCGACCGGCAACAGCGCTCACGCTAGCCTCCTCCTCCGTTCGGGCAGCTTATCGTTTTTATTTACCGCTCCATATGCTCATGGCGCTGACGCTGCTACCGCTGCTCTCCCCAGCTTTTCGGCCGCTGCTGCTCGTAGATTTGCTGCTGACCACGGCCTGGCTGTGCGGGCTGTGGCGCTCCGGGTAGCTGACGCTGAAGACGCTTTTCGC…
HDDP-NC3	GCCAGTGCCGCCGAGCAGGCCGCCTTCCGATTAGTCGGCCACCGAAACTTCGTCCGGTTCAACCCGCGATCGGACCGATTCCACACCCTGGCCTTCCATCACGTCGAGTTGTGGTGCGCCGACGCAGCCTCTGCGGCGGGCCGATTCTCTTTCGGCTTGGGCGCCCCCCTGGCCGCGAGGTCGGACTTGAGCACGGGCAACAGCGCCCACGCCTCGCTACTCCTGCGCTCGGGCAGCCTGTCGTTCCTGTTCACCGCCCCGTATGCCCATGGCGCCGACGCCGCCACGGCGGCGCTACCGAGCTTCAGTGCTGCGGCCGCGCGCCGCTTCGCCGCGGACCACGGCCTGGCCGTCCGCGCGGTCGCGCTCCGAGTCGCGGACGCGGAGGATGCGTTCCGC…
